# Supplementary material
Source: PubMed Central journal article supplement (PMC7724898)

## **SUPPLEMENTARY APPENDIX**

### **Supplementary methods**

#### **Literature search and study selection**

Medical subject heading (MeSH) terms for MM were “multiple myeloma” and “neoplasm, residual.” Non-MeSH search terms were “Kahler disease” (or “Kahler’s disease” or “myelomatosis” or “plasma cell myeloma”) and “minimal residual disease” (or “MRD”). Selected congress abstracts published between 2016 and 2019, including additional literature, were manually reviewed. Bibliographies of SLR articles on MM published between 2014 and 2019 were reviewed manually to identify additional potentially relevant publications. Additional sources were used for validation, including studies identified in public assessment reports published by the European Medicines Agency and the US Food and Drug Administration.

Population, interventions, comparisons, outcomes, and study design (PICOS) criteria were used to define eligibility. Patients could have received any type of therapy except allogeneic stem cell transplantation. Studies with PFS or OS data that could not be extracted or reconstructed were excluded. Studies with patients who did not have a primary diagnosis of MM were also excluded, as were those with MRD measured only in peripheral blood or assessed only by positron emission tomography–computed tomography scanning.

#### **Data extraction and preparation**

Other baseline characteristics such as patient age, disease setting, and cytogenetic profile were also extracted. Information on the number and types of previous lines of therapy, MRD parameters including the definition, type (prespecified, secondary, or exploratory endpoint), method of evaluation (MFC, NGF, NGS, or PCR), and level of sensitivity of the MRD technique were extracted.

HRs and p-values were collected for PFS and OS comparing MRD-negative patients with MRD-positive patients. HRs for PFS and OS, stratified by MRD status, were estimated for subgroups by 1) disease settings (NDMM patients who were transplant eligible or transplant ineligible, and patients with RRMM); 2) MRD sensitivity threshold at  $10^{-4}$ ,  $10^{-5}$ , and  $10^{-6}$  defined as one MM cell per 10,000, 100,000, and 1,000,000 nucleated cells, respectively; 3) cytogenetic risk (high risk and standard risk) wherein high risk was predominantly defined as the presence of t(4;14) and t(14;16), and/or del(17p) abnormalities, and standard risk was defined as the absence of high risk genetic abnormalities; 4) method of MRD assessment (MFC, NGF, NGS, and PCR); 5) depth of

clinical response at the time of MRD measurement; MRD was only measured in patients achieving CR or better, or those achieving VGPR or better; and 6) measurement of MRD status pre-maintenance and at 12 months after start of maintenance therapy.

**Supplementary Table 1.** Main characteristics of the studies included in the meta-analysis

ASCT, autologous stem cell transplantation; BiCTd, clarithromycin, cyclophosphamide, thalidomide, and dexamethasone; C-VAMP, vincristine, amethopterin, methotrexate, and prednisone + cyclophosphamide; CRd, lenalidomide, cyclophosphamide, and dexamethasone; CTd, cyclophosphamide, thalidomide, and dexamethasone. CVAd=cyclophosphamide, vincristine, doxorubicin, and dexamethasone; D-Rd, daratumumab, lenalidomide, and dexamethasone; D-Vd, daratumumab, bortezomib, and dexamethasone; D-VMP, daratumumab, bortezomib, melphalan, and prednisone; HDT, high-dose chemotherapy; ImiD, immunomodulatory drugs; KCd, carfilzomib, cyclophosphamide and dexamethasone; KMP, carfilzomib, melphalan and prednisone; LEN, lenalidomide; PACE, cisplatin, doxorubicin, cyclophosphamide, etoposide; Pad, bortezomib, doxorubicin and dexamethasone; PI, protease inhibitors; Rd, lenalidomide plus dexamethasone; RCd, lenalidomide cyclophosphamide and dexamethasone; RVd, lenalidomide, bortezomib, and dexamethasone; SCT, stem cell transplantation; VAd, vincristine, doxorubicin, and dexamethasone; VBAD, vincristine, carmustine, adriamycin, and dexamethasone; VBMCP, vincristine, carmustine, melphalan, cyclophosphamide, and prednisone; Vd, bortezomib and dexamethasone; VCd, cyclophosphamide, and dexamethasone; VMP, bortezomib, melphalan and prednisone; VRd, bortezomib, lenalidomide, and dexamethasone; VTd, bortezomib, thalidomide, and dexamethasone; VTdC, bortezomib, thalidomide, and dexamethasone + cyclophosphamide; VTP, bortezomib, thalidomide, and prednisone.

**Supplementary Figure 1.** Forest plots of (A) PFS and (B) OS by disease setting

CI, confidence interval; HR, hazard ratio; MRD, minimal residual disease; NDMM, newly diagnosed multiple myeloma; No., number; OS, overall survival; PFS, progression-free survival; RRMM, relapsed/refractory multiple myeloma; TE, treatment eligible; TIE, treatment ineligible.

**Supplementary Figure 2.** Forest plots of (A) PFS and (B) OS by MRD sensitivity thresholds of  $10^{-4}$ ,  $10^{-5}$ , and  $10^{-6}$

<sup>a</sup>MRD assessed at sensitivity threshold of  $2 \times 10^{-6}$ . CI, confidence interval; HR, hazard ratio; MRD, minimal residual disease; No., number; OS, overall survival; PFS, progression-free survival.

**Supplementary Figure 3.** Forest plots of (A) PFS and (B) OS by cytogenetic risk

CI, confidence interval; HR, hazard ratio; MRD, minimal residual disease; No., number; OS, overall survival; PFS, progression-free survival.

**Supplementary Figure 4.** Forest plots of (A) PFS and (B) OS by method of MRD assessment.

The MFC subgroup only includes studies with MRD assessment at the  $10^{-5}$  and  $10^{-6}$  sensitivity thresholds. CI, confidence interval; HR, hazard ratio; MFC, multiparameter flow cytometry; MRD, minimal residual disease; NGS, next-generation sequencing; No., number; OS, overall survival; PCR, polymerase chain reaction; PFS, progression-free survival.

**Supplementary Figure 5.** Forest plots of (A) PFS and (B) OS by depth of clinical response at the time of MRD measurement. Complete response or better subgroup includes studies that reported immunophenotypic complete response, stringent complete response, or near-complete response. Very good partial response or better subgroup does not overlap with complete response. CI, confidence interval; HR, hazard ratio; MRD, minimal residual disease; No., number; OS, overall survival; PFS, progression-free survival.

**Supplementary Figure 6.** Forest plots of PFS by assessment of MRD status pre-maintenance and at 12 months after start of maintenance therapy.

Includes only those studies that measured MRD pre-maintenance and at 12 months after start of maintenance therapy. CI, confidence interval; HR, hazard ratio; MRD, minimal residual disease; No., number; PFS, progression-free survival.

**Supplementary Table.**

| <b>Study</b>   | <b>Study type</b>             | <b>Study population</b> | <b>Study treatment</b>                                                 | <b>Total participants assessed for MRD, n</b> | <b>Participants who achieved MRD negativity, %</b> |
|----------------|-------------------------------|-------------------------|------------------------------------------------------------------------|-----------------------------------------------|----------------------------------------------------|
| Swedin, 1998   | Non-randomised clinical trial | NDMM-TE                 | VAd and HDT induction + ASCT                                           | 10                                            | 50%                                                |
| Rawstron, 2002 | Non-randomised clinical trial | NDMM-TE                 | C-VAMP and HDT induction + ASCT                                        | 45                                            | 59%                                                |
| Bakkus, 2004   | Non-randomised clinical trial | NDMM-TE                 | Conventional chemo + ASCT                                              | 60                                            | 30%                                                |
| Paiva, 2008    | Non-randomised clinical trial | NDMM-TE                 | VBMCP/VBAd induction + ASCT + melphalan consolidation                  | 295                                           | 42%                                                |
| Putkonen, 2010 | Non-randomised clinical trial | NDMM-TE                 | NA                                                                     | 37                                            | 57%                                                |
| Korthals, 2012 | Non-randomised clinical trial | NDMM-TE                 | HDT induction + ASCT, maintenance with interferon alpha or thalidomide | 53                                            | 45%                                                |
| Rawstron, 2013 | Randomised clinical trial     | NDMM-TE                 | CTd or CVAd + ASCT                                                     | 397                                           | 86%                                                |
| Ferrero, 2015  | Non-randomised clinical trial | NDMM-TE                 | ASCT + VTd consolidation                                               | 39                                            | 68%                                                |
| Ludwig, 2015   | Randomised clinical trial     | NDMM-TE                 | VTd or VTdC + SCT                                                      | 42                                            | 81%                                                |
| Cohen, 2016    | Non-randomised clinical trial | NDMM-TE                 | ASCT + Bortezomib consolidation                                        | 19                                            | 68%                                                |
| Solovev, 2016  | Non-randomised clinical trial | NDMM-TE                 | ASCT+ Maintenance therapy with Bortezomib                              | 52                                            | 48%                                                |

|                   |                                   |               |                                                                                           |               |     |
|-------------------|-----------------------------------|---------------|-------------------------------------------------------------------------------------------|---------------|-----|
| Chakraborty, 2017 | Retrospective observational study | NDMM-TE       | ASCT                                                                                      | 185           | 56% |
| Popat, 2017       | Non-randomised clinical trial     | NDMM-TE       | PAd induction + ASCT (arm 1)                                                              | 27            | 26% |
|                   |                                   |               | PAd induction followed by no further treatment (arm 2)                                    | 50            | 36% |
| Oliva, 2017       | Randomised clinical trial         | NDMM-TE       | VCd induction + VMP or HDM intensification + ASCT +/- VRD consolidation + LEN maintenance | 316           | 76% |
| Schinke, 2017     | Non-randomised clinical trial     | NDMM-TE       | VTd and PACE chemo + ASCT + consolidation (?) + VRD maintenance                           | 109           | 35% |
| Austin, 2018      | Retrospective observational study | NDMM-TE, RRMM | ASCT                                                                                      | 124 (NDMM-TE) | 47% |
|                   |                                   |               |                                                                                           | 26 (RRMM)     | 62% |
| Clark, 2018       | Non-randomised clinical trial     | NDMM-TE       | VRD induction + ASCT                                                                      | 25            | 72% |
| Gu, 2018          | Non-randomised clinical trial     | NDMM-TE       | Bortezomib induction + ASCT                                                               | 104           | 66% |
| Perrot, 2018      | Randomised clinical trial         | NDMM-TE       | RVd                                                                                       | 239           | 38% |
| Rossi, 2018       | Non-randomised clinical trial     | NDMM-TE       | PAD induction                                                                             | 30            | 50% |
| Shah, 2018        | Non-randomised clinical trial     | NDMM-TE       | Bortezomib or LEN induction + ASCT                                                        | 25            | 48% |
| Solovev, 2018     | Non-randomised clinical trial     | NDMM-TE       | Bortezomib induction + ASCT + LEN maintenance                                             | 37            | 62% |

|                      |                                   |          |                                                                                            |      |     |
|----------------------|-----------------------------------|----------|--------------------------------------------------------------------------------------------|------|-----|
| Avet-Loiseau, 2019   | Randomised clinical trial         | NDMM-TE  | D-VTd or VTd                                                                               | 1085 | 54% |
| Gambella, 2019       | Randomised clinical trial         | NDMM-TE  | LEN or with LEN + prednisone                                                               | 73   | 73% |
| Hahn, 2019           | Randomised clinical trial         | NDMM-TE  | ASCT + RVD consolidation + LEN maintenance                                                 | 437  | 56% |
| Paiva, 2020          | Randomised clinical trial         | NDMM-TE  | Induction with VRD + ASCT + consolidation with VRD                                         | 357  | 57% |
| Mateos, 2014         | Randomised clinical trial         | NDMM-TIE | VMP or VTP induction + bortezomib and thalidomide or bortezomib and prednisone maintenance | 153  | 22% |
| De Tute, 2016        | Randomised clinical trial         | NDMM-TIE | RCda (arm 1)                                                                               | 154  | 16% |
|                      |                                   |          | CTda (arm 2)                                                                               | 143  | 11% |
| Sanchez-Vega, 2016   | Non-randomised clinical trial     | NDMM-TIE | VMP or VTP induction + bortezomib and thalidomide or bortezomib and prednisone maintenance | 110  | NA  |
| Martinez-Lopez, 2017 | Randomised clinical trial         | NDMM-TIE | VMP + Rd or alternating VMP/Rd                                                             | 73   | 20% |
| Bahlis, 2019         | Randomised clinical trial         | NDMM-TIE | D-Rd (arm 1)                                                                               | 369  | 29% |
|                      |                                   |          | Rd (arm 2)                                                                                 | 368  | 8%  |
| Facon, 2019          | Randomised clinical trial         | NDMM-TIE | KMP or VMP induction                                                                       | 327  | 23% |
| Li, 2019             | Retrospective observational study | NDMM-TIE | VCd or BiCTd as induction and consolidation                                                | 123  | 25% |

|                              |                                   |           |                                                                                                                                           |     |     |
|------------------------------|-----------------------------------|-----------|-------------------------------------------------------------------------------------------------------------------------------------------|-----|-----|
| Mateos, 2019                 | Randomised clinical trial         | NDMM-TIE  | D-VMP (arm 1)                                                                                                                             | 350 | 23% |
|                              |                                   |           | VMP (arm 2)                                                                                                                               | 356 | 8%  |
| Paiva, 2015                  | Non-randomised clinical trial     | RRMM      | Salvage therapy (different types of treatments, not specified)                                                                            | 31  | 42% |
| Avet-Loiseau, 2018 (Study 1) | Randomised clinical trial         | RRMM      | D-Vd (arm 1)                                                                                                                              | 251 | 14% |
|                              |                                   |           | Vd (arm 2)                                                                                                                                | 247 | 2%  |
| Avet-Loiseau, 2018 (Study 2) | Randomised clinical trial         | RRMM      | D-Rd (arm 1)                                                                                                                              | 286 | 31% |
|                              |                                   |           | Rd (arm 2)                                                                                                                                | 283 | 6%  |
| Yong, 2018                   | Randomised clinical trial         | RRMM      | KCd induction and carfilzomib maintenance or no maintenance                                                                               | 141 | 13% |
| Martinez-Sanchez, 2008       | Non-randomised clinical trial     | Undefined | VBCMP/<br>VBAD followed by high dose chemotherapy (melphalan 200 mg/m <sup>2</sup> ) with autologous peripheral blood stem cell support   | 53  | 53% |
| Silvennoinen, 2014           | Non-randomised clinical trial     | Undefined | Induction therapy with bortezomib and dexamethasone + mobilization with cyclophosphamide and granulocyte colony-stimulating factor + ASCT | 22  | 68% |
| Korde, 2015                  | Non-randomised clinical trial     | Undefined | KRd with lenalidomide maintenance                                                                                                         | 45  | 32% |
| Fukomoto, 2016               | Retrospective observational study | Undefined | ASCT in 37% of patients + either maintenance therapy with bortezomib + dexamethasone or no further therapy                                | 78  | 44% |



|                      |                                   |           |                                                                |    |     |
|----------------------|-----------------------------------|-----------|----------------------------------------------------------------|----|-----|
| Flores-Montero, 2017 | Retrospective observational study | Undefined | Salvage therapy (different types of treatments, not specified) | 79 | 47% |
| Rasche, 2018         | Non-randomised clinical trial     | Undefined | Novel agents (unspecified) + ASCT                              | 83 | 41% |
| Alonso, 2019         | Retrospective observational study | Undefined | NA                                                             | 84 | 65% |

---

A

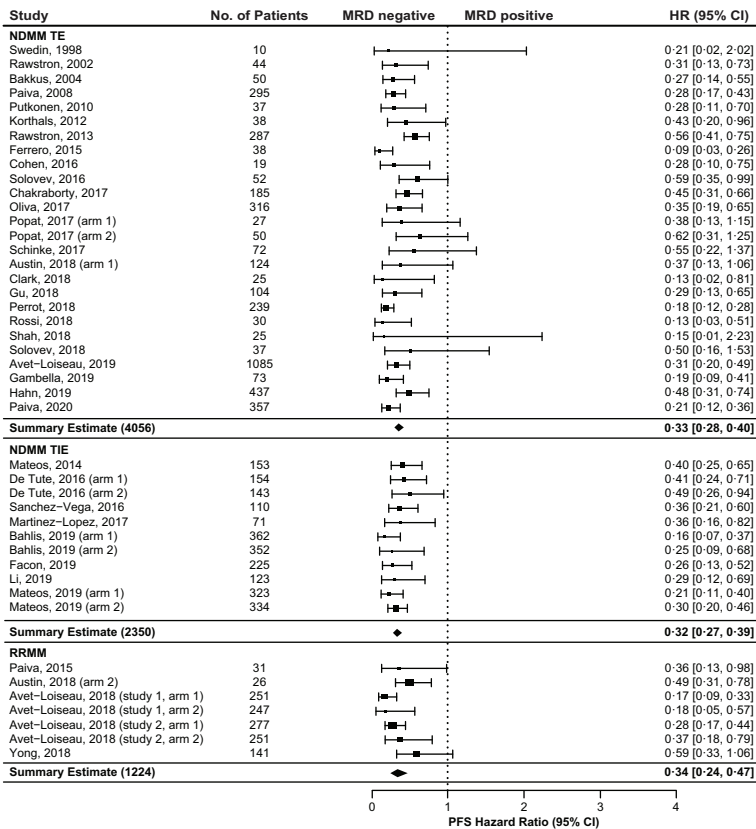

B

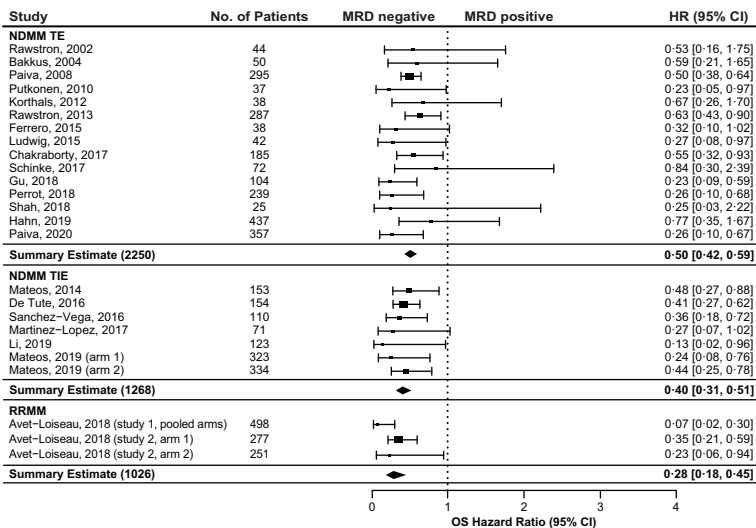

A

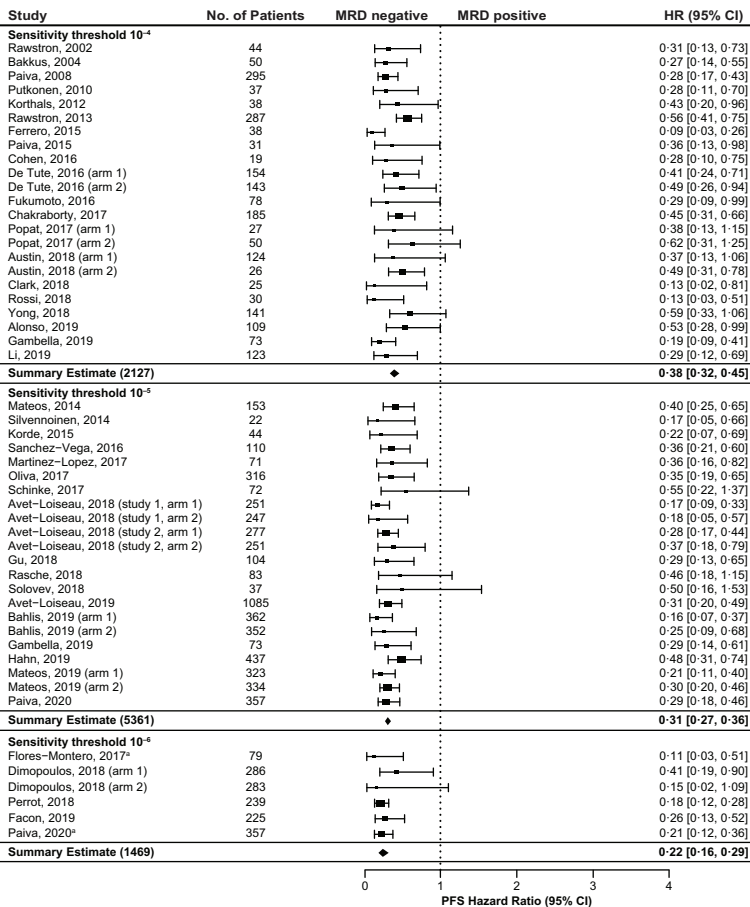

B

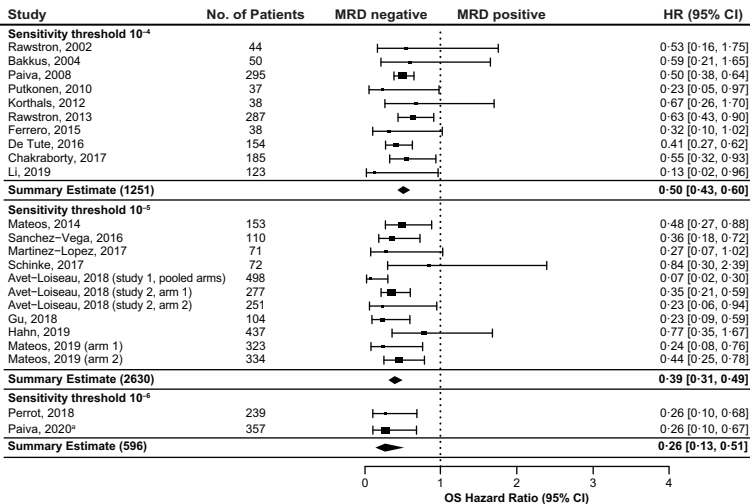

A

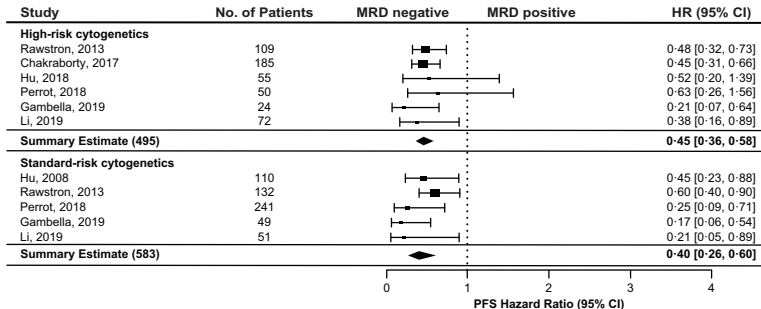

B

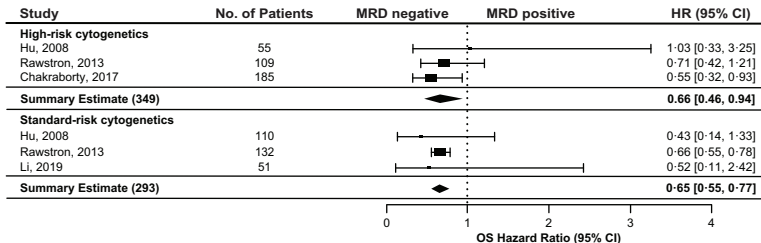

A

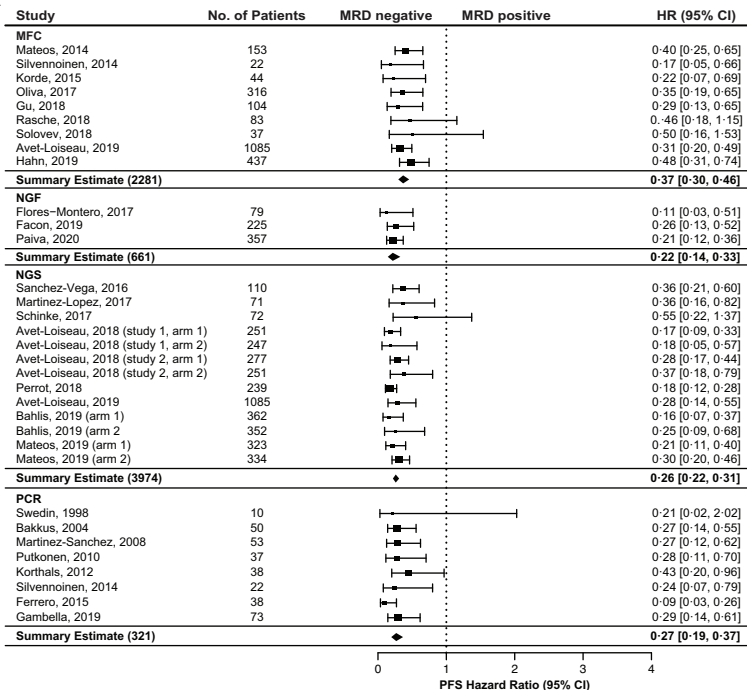

B

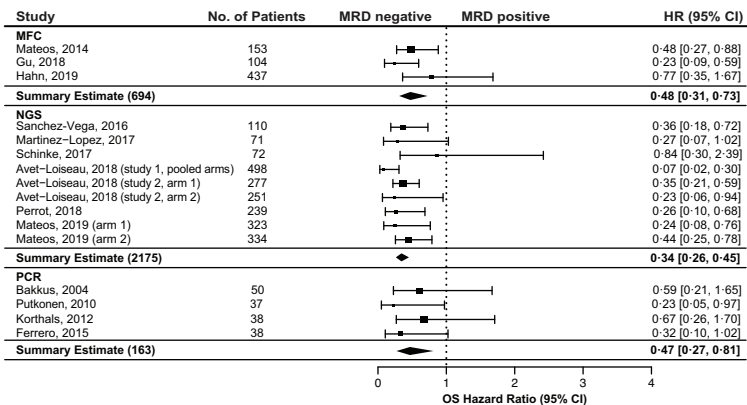

A

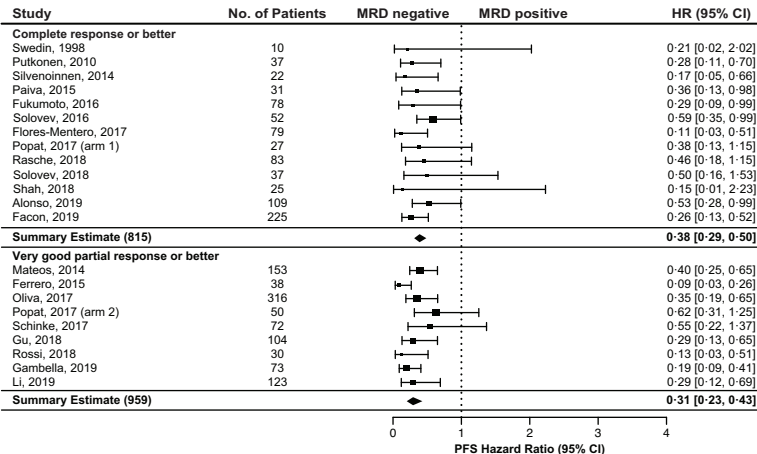

B

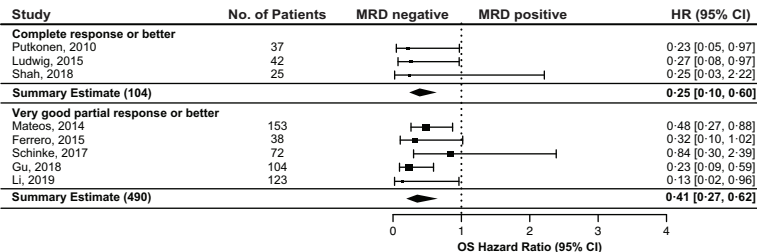

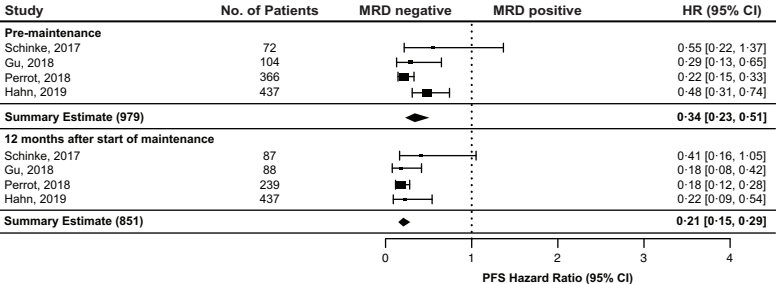

Supplement: advancesADV2020002827-suppl1.pdf [file advancesADV2020002827-suppl1.pdf]
